46. Anello C: FDA principles on clinical investigations. *FDA Papers* 4:14-15; 23-24, 1970
47. Federal Register, May 8, 1970
48. Human Experimentation. Code of Ethics of the World Medical Association. *Brit Med J* 2:177, 1964
49. Responsibility in Investigations on Human Subjects. Statement by Medical Research Council. *Brit Med J* 2:178-180, 1964
50. AMA endorsed Declaration of Helsinki. *JAMA* 197(3):18; (11):31, 1966
51. Minchew BH, Gallogly C: Informed consent. *FDA Papers* 1:8-11, 1967
52. Sneddon JM, Turner P: Ephedrine mydriasis in hypertension and the response to treatment. *Clin Pharmacol Ther* 10:64-71, 1969
53. Fink M: EEG and human psychopharmacology. *Ann Rev Pharmacol* 9:241-258, 1969
54. Leon AS, Abrams WB, Markowitz M, et al.: The use of pressor sensitivity tests for detection of drugs with sympathetic nervous system activity. *J Clin Pharmacol* 9:399-407, 1969
55. Solomon HM: Clinical disorders of drug interaction. *Advances in Internal Medicine*. Vol 16, pp 285-301. Edited by GH Stollerman. Year Book Publishers, 1970
56. Ross EM, Robertson PGC, Watson II: Failure of oral propranolol to maintain relief from paroxysmal syncopal attacks in Fallot's tetralogy after its successful intravenous use. *Lancet* 2:945, 1966
57. Shand DG, Nicholls EM, Oates JA: Plasma propranolol levels in adults, with observations in four children. *Clin Pharmacol Ther* 11:112-120, 1970
58. Kalow W: Genetic factors in relation to drugs. *Ann Rev Pharmacol* 5:9-26, 1965
59. Summary of the National Halothane Study. *JAMA* 197:775-788, 1966
60. Dykes MHM, Bunker JP: Hepatotoxicity and anesthetics. *Pharmacol Physicians* 4(11): 1-5, 1970
61. Clymer HA: The changing costs and risks of pharmaceutical innovation, *The Economics of Drug Innovation*. Edited by JD Cooper. Washington, D. C., The American University, 1970, pp 109-124
62. Mund VA: The return on investment of the innovative pharmaceutical firm, *The Economics of Drug Innovation*. Edited by JD Cooper. Washington, D. C., The American University, 1970, pp 125-138

## Drugs

**DRUG COMA** The increasing use of diuresis and dialysis to treat patients with drug coma has created a need for rapid and detailed toxicologic information about the unconscious patient. A gas chromatographic method was used to screen plasma from 41 patients with suspected drug coma. In each of 37 a barbiturate, meprobamate, glutethimide, or a combination of these sedatives was found in sufficient concentration to explain the coma. In more than half of these cases, the histories available at the time of admission proved unreliable as guides for identifying the drugs causing the comas. Gas-liquid chromatography is uniquely suited for the rapid diagnosis of drug intoxication, since it permits simultaneous identification and measurement of a variety of sedative agents. (Bloomer, A. A., and others: *Rapid Diagnosis of Sedative Intoxication by Gas Chromatography*, *Ann. Intern. Med.* 72: 223 (Feb.) 1970.)

**PRENYLAMINE LACTATE** Prenylamine lactate (N-[3,3-diphenylpropyl]-methylphenethylamine) has been shown by double-blind techniques to have reduced the anginal attack rate from 6.1 to 4.2 per week in 12 subjects ( $P < 0.01$ ). Prenylamine inhibits the uptake of norepinephrine by storage granules in sympathetic nerve endings. The 120-240-mg daily dose of prenylamine resulted in lower mean resting pulse rates than in control subjects (74 vs. 81), but did not affect blood pressure. No evidence of congestive heart failure or bronchospasm appeared in patients taking the drug for as long as two years. (Cardoe, N.: *A 2-Year Study of the Efficacy and Tolerability of Prenylamine in the Treatment of Angina Pectoris*, *Postgrad. Med. J.* 46: 708-712, 1970.)
